# Supplementary material
Source: ML conference proceedings conference paper supplement (https://proceedings.neurips.cc/paper_files/paper/2020/hash/e4d78a6b4d93e1d79241f7b282fa3413-Abstract.html)
Supplement: Supplementary file [file e4d78a6b4d93e1d79241f7b282fa3413-Supplemental.pdf]

## 1 0.1 Reinforcement Learning, A2C and V-trace

2 **Reinforcement learning** In RL, an agent observes a state  $s_t$  at time  $t$  and follows a policy  $\pi = \pi(s_t)$   
 3 to select an action  $a_t$ ; the agent also receives a scalar reward  $r_t$  from the environment. The goal of  
 4 RL is to optimize  $\pi$  such that the sum of the expected rewards is maximized.

5 In model-free policy gradient methods  $\pi(a_t|s_t; \theta)$  is the output of a policy DNN with weights  $\theta$ , and  
 6 represents the probability of selecting action  $a_t$  in the state  $s_t$ . Updates to the DNN are generally  
 7 aligned in the direction of the gradient of  $E[R_t]$ , where  $R_t = \sum_{i=0}^{\infty} \gamma^i r_{t+i}$  is the discounted reward  
 8 from time  $t$ , with discount factor  $\gamma \in (0, 1]$  (see also REINFORCE [5]) The vanilla implementation  
 9 updates  $\theta$  along  $\nabla_{\theta} \log \pi(a_t|s_t; \theta) R_t$ , which is an unbiased estimator of  $\nabla_{\theta} E[R_t]$ . The training  
 10 procedure can be improved by reducing the variance of the estimator by subtracting a learned *baseline*  
 11  $b_t(s_t)$  and using the gradient  $\nabla_{\theta} \log \pi(a_t|s_t; \theta) [R_t - b_t(s_t)]$ . One common baseline is the value  
 12 function  $V^{\pi}(s_t) = E[R_t|s_t]$ , which is the expected return for the policy  $\pi$  starting from  $s_t$ . The  
 13 policy  $\pi$  and the baseline  $b_t$  can be viewed as *actor* and *critic* in an actor-critic architecture [4].

14 **A2C** A2C [3] is the synchronous version of A3C [2], a successful actor-critic algorithm, where a  
 15 single DNN outputs a softmax layer for the policy  $\pi(a_t|s_t; \theta)$ , and a linear layer for  $V(s_t; \theta)$ . In  
 16 A2C, multiple agents perform simultaneous steps on a set of parallel environments, while the DNN is  
 17 updated every  $t_{max}$  actions using the experiences collected by all the agents in the last  $t_{max}$  steps.  
 18 This means that the variance of the critic  $V(s_t; \theta)$  is reduced (at the price of an increase in the bias)  
 19 by  $N$ -step bootstrapping, with  $N = t_{max}$ . The cost function for the policy is then:

$$\log \pi(a_t|s_t; \theta) \left[ \tilde{R}_t - V(s_t; \theta) \right] + \beta H[\pi(s_t; \theta)], \quad (1)$$

20 where  $\theta_t$  are the DNN weights  $\theta$  at time  $t$ ,  $\tilde{R}_t = \sum_{i=0}^{k-1} \gamma^i r_{t+i} + \gamma^k V(s_{t+k}; \theta_t)$  is the bootstrapped  
 21 discounted reward from  $t$  to  $t+k$  and  $k$  is upper-bounded by  $t_{max}$ , and  $H[\pi(s_t; \theta)]$  is an entropy  
 22 term that favors exploration, weighted by the hyper-parameter  $\beta$ . The cost function for the estimated  
 23 value function is:

$$\left[ \tilde{R}_t - V(s_t; \theta) \right]^2, \quad (2)$$

24 which uses, again, the bootstrapped estimate  $\tilde{R}_t$ . Gradients  $\nabla \theta$  are collected from both of the cost  
 25 functions; standard optimizers, such as Adam or RMSProp, can be used for optimization.

26 **V-trace** In the case where there is a large number of environments, such as in CuLE or IMPALA [1],  
 27 the synchronous nature of A2C become detrimental for the learning speed, as one should wait for all  
 28 the environments to complete  $t_{max}$  steps before computing a single DNN update. Faster convergence  
 29 is achieved (both in our paper and in [1]) by desynchronizing data generation and DNN updates,  
 30 which in practice means sampling a subset of experiences generated by the agents, and updating the  
 31 policy using an approximate gradient, which makes the algorithm slightly off-policy.

32 To correct for the off-policy nature of the data, that may lead to inefficiency or, even worse, instabilities,  
 33 in the training process, V-trace is introduced in [1]. In summary, the aim of off-policy correction is to  
 34 give less weight to experiences that have been generated with policy  $\mu$ , called the *behaviour policy*,  
 35 when it differs from the *target policy*,  $\pi$ ; for a more principled explanation we remand the curious  
 36 reader to [1].

37 For a set of experiences collected from time  $t = t_0$  to time  $t = t_0 + N$  following some policy  $\mu$ , the  
 38  $N$ -steps V-trace target for  $V(s_{t_0}; \theta)$  is defined as:

$$v_{t_0} = V(s_{t_0}; \theta) + \sum_{t=t_0}^{t_0+N-1} \gamma^{t-t_0} \left( \prod_{i=t_0}^{t-1} c_i \right) \delta_t V, \quad (3)$$

$$\delta_t V = \rho_t (r_t + \gamma V(s_{t+1}; \theta) - V(s_t; \theta)) \quad (4)$$

$$\rho_t = \min \left( \bar{\rho}, \frac{\pi(a_t|s_t)}{\mu(a_t|s_t)} \right) \quad (5)$$

$$c_i = \min \left( \bar{c}, \frac{\pi(a_i|s_i)}{\mu(a_i|s_i)} \right); \quad (6)$$

39  $\rho_t$  and  $c_i$  are truncated importance sampling (IS) weights, and  $\prod_{i=t_0}^{t-1} c_i = 1$  for  $s = t$ , and  $\bar{\rho} \geq \bar{c}$ .  
 40 Notice that, when we adopt the proposed multi-batching strategy, there are multiple behaviour policies

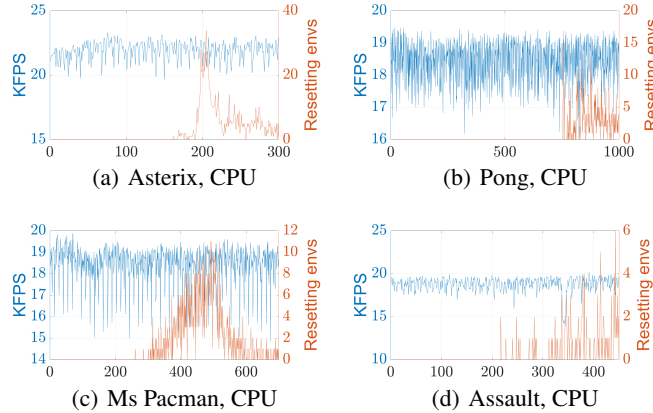

Figure 1: FPS as a function of the environment step, measured on System I in Table ?? for *emulation only* on four Atari games, 512 environments, for CuLE<sub>CPU</sub>; each panel also shows the number of resetting environments. A peak in the FPS at the beginning of the emulation period, as in the case of GPU emulation in Fig. ??, is not visible in this case.

41  $\mu$  that have been followed to generate the training data — e.g.,  $N$  different policies are used when  
 42  $SPU=1$  in Fig. ?. Eqs. 5-6 do not need to be changed in this case, but we have to store all the  
 43  $\mu(a_i|s_i)$  in the training buffer to compute the, V-trace corrected, DNN update. In our implementation,  
 44 we compute the V-trace update recursively as:

$$v_t = V(s_t; \theta) + \delta_t V + \gamma c_s (v_{t+1} - V(s_{t+1}; \theta)). \quad (7)$$

45 At training time  $t$ , we update  $\theta$  with respect to the value output,  $v_s$ , given by:

$$(v_t - V(s_t; \theta)) \nabla_{\theta} V(s_t; \theta), \quad (8)$$

46 whereas the policy gradient is given by:

$$\rho_t \nabla_{\omega} \log \pi_{\omega}(a_s|s_t) (r_t + \gamma v_{t+1} - V(s_t; \theta)). \quad (9)$$

47 An entropy regularization term that favors exploration and prevents premature convergence (as in  
 48 Eq. 1) is also added.

49

## 50 0.2 Thread divergence is not present in the case of CPU emulation

51 We show here that thread divergence, that affects GPU-based emulation (see Fig. ??), does not affect  
 52 CPU-based emulation. Fig. 1 shows the FPS on four Atari games where all the environments share  
 53 the same initial state. In contrast with GPU emulation, the CPU FPS do not peak at the beginning of  
 54 the emulation period, where many environments are correlated.

## 55 0.3 Performance during training - other games

56 For sake of space, we only report (Fig. 2) the FPS measured on system I in Table ?? for three  
 57 additional games, as a function of different load conditions and number of environments.

58

## 59 0.4 Correctness of the implementation

60 To demonstrate the correctness of our implementation, and thus that policies learned with CuLE  
 61 generalize to the same game emulated by OpenAI Gym, we report in Fig. 3 the average scores  
 62 achieved in testing, while training an agent with with A2C+V-trace and CuLE. The testing scores  
 63 measured on CuLE<sub>CPU</sub> and OpenAI Gym environments do not show any relevant statistical difference,  
 64 even for the case of Ms-Pacman, where the variability of the scores is higher because of the nature of  
 65 the game.

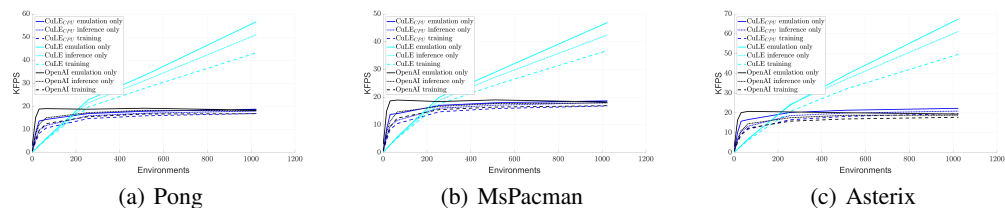

Figure 2: FPS generated by different emulation engines on System I in Table ?? for different Atari games, as a function of the number of environments, and different load conditions (the main A2C [3] loop is run here, with N-step bootstrapping,  $N = 5$ ).

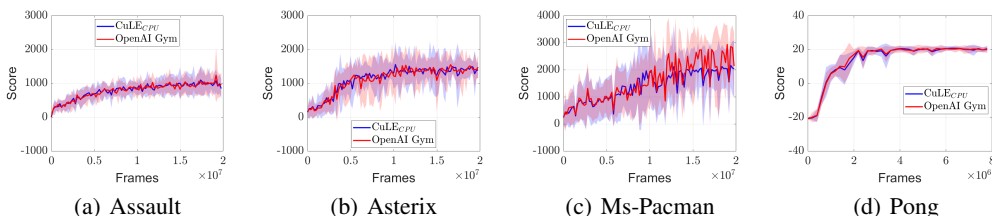

Figure 3: Average testing scores measured on 10 CuLE<sub>CPU</sub> and OpenAI Gym environments, while training with A2C+V-trace and CuLE, as a function of the training frames; 250 environments are used for Ms-Pacman, given its higher variability. The shaded area represents 2 standard deviations.

## 66 References

- 67 [1] Lasse Espeholt, Hubert Soyer, Rémi Munos, Karen Simonyan, Volodymyr Mnih, Tom Ward,  
68 Yotam Doron, Vlad Firoiu, Tim Harley, Iain Dunning, Shane Legg, and Koray Kavukcuoglu.  
69 IMPALA: scalable distributed deep-rl with importance weighted actor-learner architectures.  
70 *CoRR*, abs/1802.01561, 2018.
- 71 [2] Volodymyr Mnih, Adria Puigdomenech Badia, Mehdi Mirza, Alex Graves, Timothy Lillicrap, Tim  
72 Harley, David Silver, and Koray Kavukcuoglu. Asynchronous methods for deep reinforcement  
73 learning. In Maria Florina Balcan and Kilian Q. Weinberger, editors, *Proceedings of The 33rd  
74 International Conference on Machine Learning*, volume 48 of *Proceedings of Machine Learning  
75 Research*, pages 1928–1937, New York, New York, USA, 20–22 Jun 2016. PMLR.
- 76 [3] OpenAI. Openai baselines: Acktr & a2c, 2017.
- 77 [4] Richard S. Sutton and Andrew G. Barto. *Introduction to Reinforcement Learning*. MIT Press,  
78 Cambridge, MA, USA, 1st edition, 1998.
- 79 [5] Ronald J Williams. Simple statistical gradient-following algorithms for connectionist reinforce-  
80 ment learning. *Machine learning*, 8(3-4):229–256, 1992.
